# Supplementary material
Source: PubMed Central journal article supplement (PMC4396492)
Supplement: JCI75417sd.pdf [file JCI75417sd.pdf]

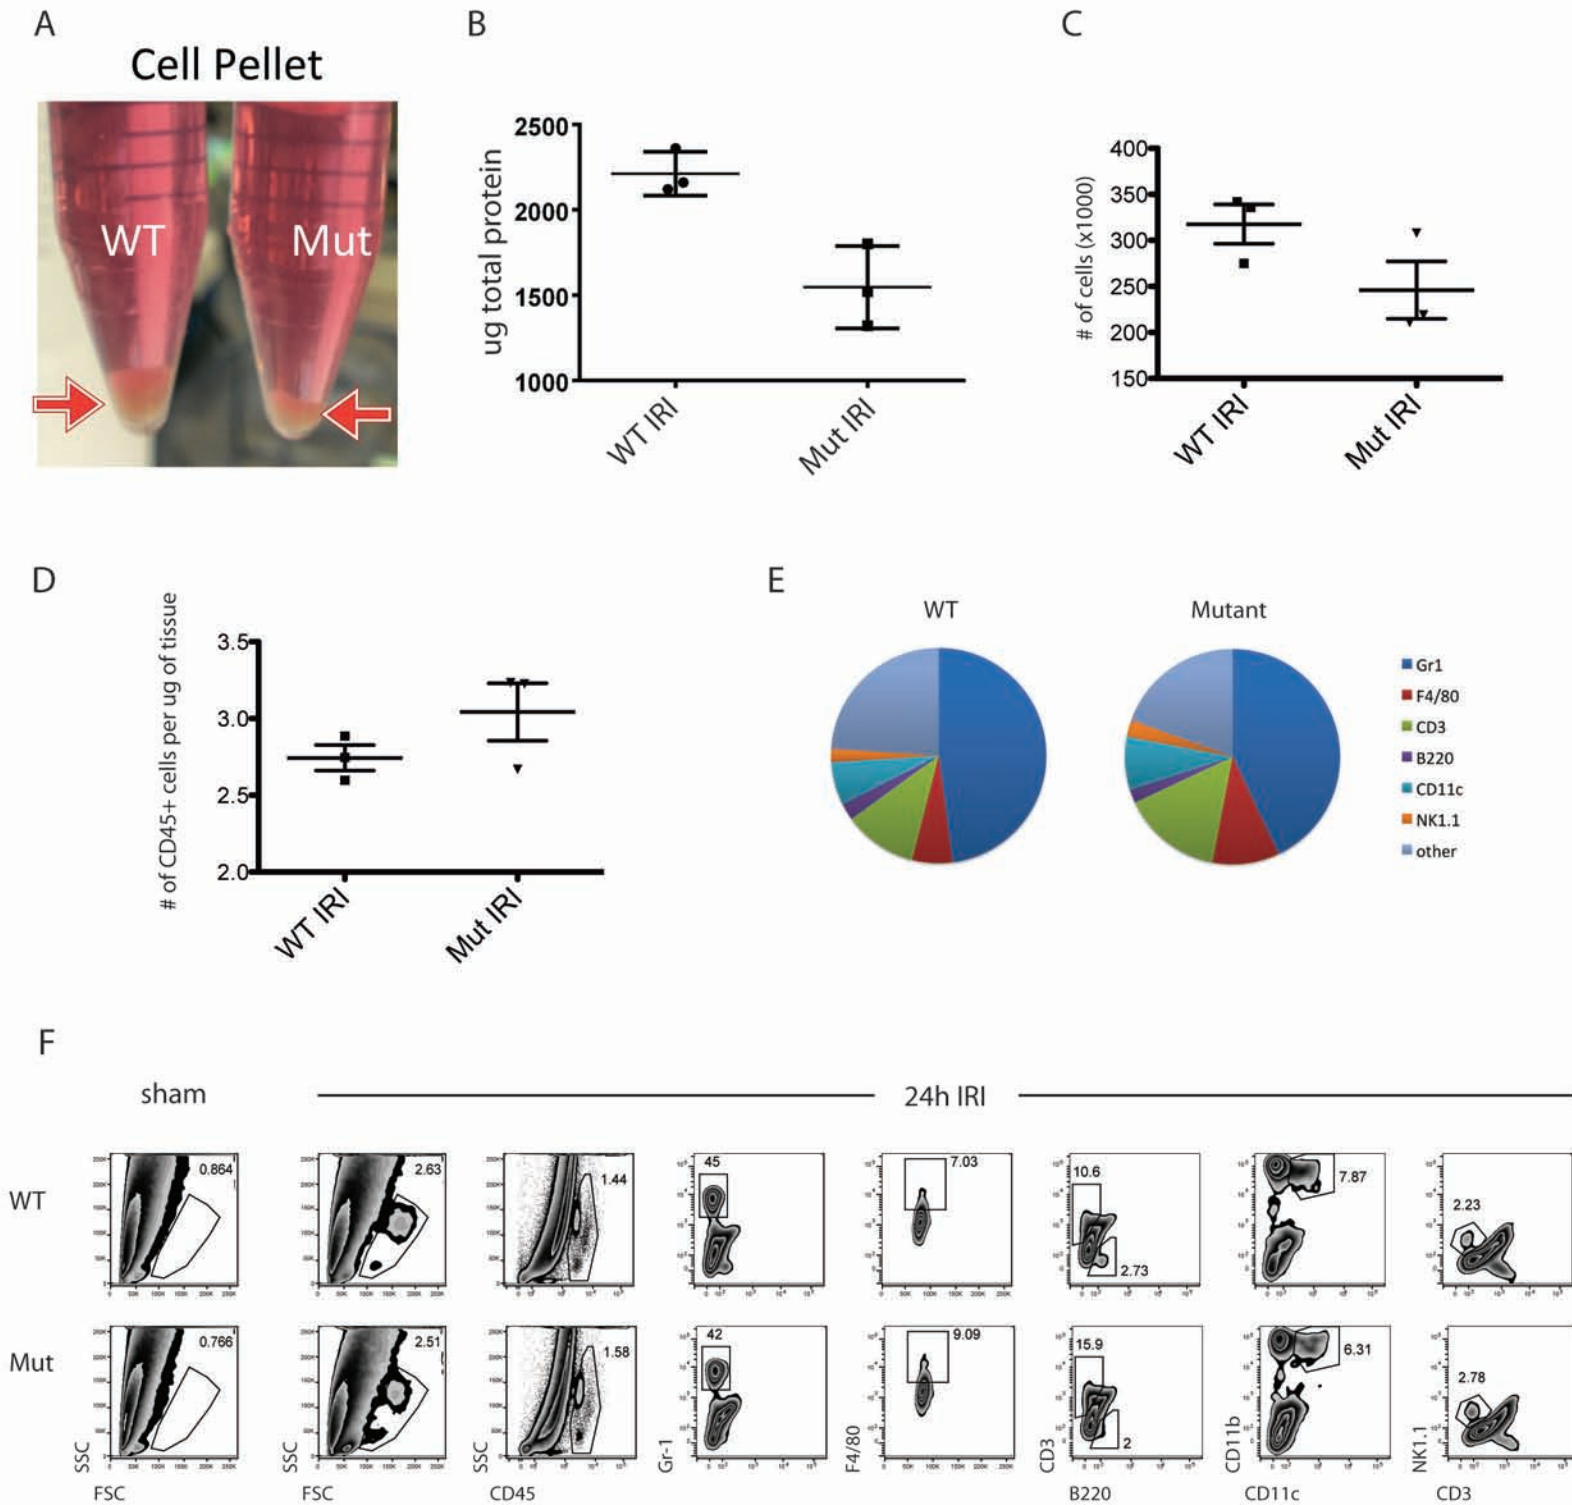

**Supplemental Figure 1: Flow cytometric analysis of immune cell infiltration in KIM-1 wild-type or KIM-1<sup>Δmucin</sup> kidneys.** (A) Representative cell pellets of total isolated cells resulting from tissue digestion of similar sized kidneys showing discrepancy in pellet size (arrows) between wild-type or KIM-1<sup>Δmucin</sup> (Mut) samples. (Representative of 3 pairs of isolates) (B) Total protein of cell isolates from post-ischemic wild-type and KIM-1<sup>Δmucin</sup> mice. (C) Flow cytometric analysis of the total number of cells isolated from kidneys following tissue digestion. (D) Flow cytometric analysis of the number of CD45+ cells per ug isolated cell protein from post-ischemic wild-type or KIM-1<sup>Δmucin</sup> mice. (E) Distribution of CD45+ cells positive for Gr1, F4/80, CD3, B220, CD11c and NK1.1 in KIM-1 WT or mutant kidneys. (F) Representative flow plots of the data shown in E. (Representative of 3 replicates)

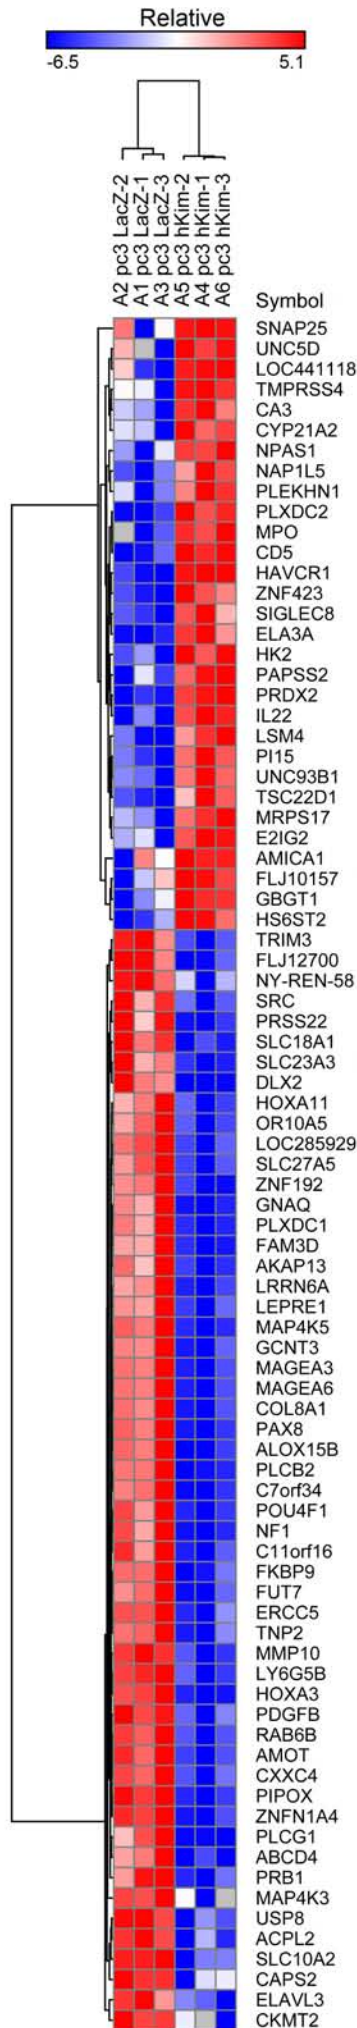

**Supplemental Figure 2. Heatmap of the genes significantly upregulated or downregulated by KIM-1 expression and listed in Supplemental Tables 1 and 2.** The heatmap was produced using clustering of rows (gene expression values) and columns (samples) of the data matrix using the complete linkage algorithm and Pearson correlation. The gene clustering tree is shown on the left, and the sample clustering tree is shown on the top. The color scale shown at the top illustrates the relative expression level of the indicated genes across all samples: red denotes expression increases and blue denotes expression decreases,  $\text{Log}_2$  scale.

Supplemental Table 1: Up-regulated genes ranked by fold change

| Description                                                   | Symbol    | Fold change | t test               |
|---------------------------------------------------------------|-----------|-------------|----------------------|
| hepatitis A virus cellular receptor 1                         | HAVCR1    | 1613.3375   | 0.0001               |
| unc-5 homolog D (C. elegans)                                  | UNC5D     | 12.7075     | 0.0067               |
| myeloperoxidase                                               | MPO       | 8.6095      | 0.0068               |
| transmembrane protease, serine 4                              | TMPRSS4   | 7.5480      | 0.0011               |
| adhesion molecule, interacts with CXADR antigen 1             | AMICA1    | 5.8016      | 0.0035               |
| similar to FLJ44216 protein; similar to cell surface antigen  | LOC441118 | 5.2281      | 0.0014               |
| 3'-phosphoadenosine 5'-phosphosulfate synthase 2              | PAPSS2    | 4.2199      | 0.0046               |
| plexin domain containing 2                                    | PLXDC2    | 4.1056      | 0.0004               |
| hypothetical protein FLJ10157                                 | FLJ10157  | 3.6479      | 0.0053               |
| hexokinase 2                                                  | HK2       | 3.3968      | 0.0015               |
| synaptosomal-associated protein, 25kDa                        | SNAP25    | 3.3519      | 0.0083               |
| neuronal PAS domain protein 1                                 | NPAS1     | 3.2458      | 0.0024               |
| sialic acid binding Ig-like lectin 8                          | SIGLEC8   | 2.6252      | 0.0084               |
| nucleosome assembly protein 1-like 5                          | NAP1L5    | 2.6077      | 0.0071               |
| cytochrome P450, family 21, subfamily A, polypeptide 2        | CYP21A2   | 2.4936      | 0.0067               |
| protease inhibitor 15                                         | PI15      | 2.4171      | 0.0023               |
| pleckstrin homology domain containing, family N member 1      | PLEKHN1   | 2.4161      | 0.0081               |
| elastase 3A, pancreatic (protease E)                          | ELA3A     | 2.3079      | 0.0023               |
| peroxiredoxin 2                                               | PRDX2     | 2.2777      | 0.0001               |
| mitochondrial ribosomal protein S17                           | MRPS17    | 2.2154      | 0.0039               |
| LSM4 homolog, U6 small nuclear RNA associated (S. cerevisiae) | LSM4      | 2.2116      | 0.0041               |
| carbonic anhydrase III, muscle specific                       | CA3       | 2.1912      | 0.0068               |
| unc-93 homolog B1 (C. elegans)                                | UNC93B1   | 2.1448      | 0.0042               |
| TSC22 domain family, member 1                                 | TSC22D1   | 2.1040      | 0.0082               |
| E2IG2 protein                                                 | E2IG2     | 2.0795      | 0.0038               |
| zinc finger protein 423                                       | ZNF423    | 2.0416      | 0.0018               |
| globoside alpha-1,3-N-acetylgalactosaminyltransferase 1       | GBGT1     | 2.0312      | 0.0025               |
| heparan sulfate 6-O-sulfotransferase 2                        | HS6ST2    | 2.0236      | 0.0028               |
| T-cell surface glycoprotein CD5 precursor                     | CD5       | 1.9327      | 9.5x10 <sup>-5</sup> |
| Interleukin-22 precursor                                      | IL22      | 1.6789      | 0.0006               |

**Supplemental Table 2: Down-regulated genes ranked by fold change**

| Description                                                                           | Symbol    | Fold Change | t test |
|---------------------------------------------------------------------------------------|-----------|-------------|--------|
| creatine kinase, mitochondrial 2                                                      | CKMT2     | 0.1271      | 0.0039 |
| mitogen-activated protein kinase kinase kinase kinase 3                               | MAP4K3    | 0.2064      | 0.0085 |
| calcyphosine 2                                                                        | CAPS2     | 0.3222      | 0.0020 |
| acid phosphatase-like 2                                                               | ACPL2     | 0.3266      | 0.0012 |
| distal-less homeo box 2                                                               | DLX2      | 0.3395      | 0.0047 |
| zinc finger protein, subfamily 1A, 4 (Eos)                                            | ZNFN1A4   | 0.3614      | 0.0001 |
| transition protein 2 (during histone to protamine replacement)                        | TNP2      | 0.3885      | 0.0034 |
| arachidonate 15-lipoxygenase, second type                                             | ALOX15B   | 0.3917      | 0.0024 |
| excision repair cross-complementing rodent repair deficiency, complementation group 5 | ERCC5     | 0.4013      | 0.0014 |
| solute carrier family 10 (sodium/bile acid cotransporter family), member 2            | SLC10A2   | 0.4045      | 0.0001 |
| CXXC finger 4                                                                         | CXXC4     | 0.4139      | 0.0014 |
| chromosome 7 open reading frame 34                                                    | C7orf34   | 0.4153      | 0.0026 |
| proline-rich protein BstNI subfamily 1                                                | PRB1      | 0.4162      | 0.0051 |
| ATP-binding cassette, sub-family D (ALD), member 4                                    | ABCD4     | 0.4181      | 0.0066 |
| pipecolic acid oxidase                                                                | PIPOX     | 0.4229      | 0.0001 |
| homeo box A3                                                                          | HOXA3     | 0.4234      | 0.0002 |
| chromosome 11 open reading frame 16                                                   | C11orf16  | 0.4246      | 0.0039 |
| solute carrier family 27 (fatty acid transporter), member 5                           | SLC27A5   | 0.4299      | 0.0043 |
| neurofibromin 1 (neurofibromatosis, von Recklinghausen disease, Watson disease)       | NF1       | 0.4322      | 0.0039 |
| Lymphocyte antigen 6 complex, locus G5B                                               | LY6G5B    | 0.4327      | 0.0002 |
| Angiomotin                                                                            | AMOT      | 0.4341      | 0.0008 |
| NY-REN-58 antigen                                                                     | NY-REN-58 | 0.4367      | 0.0060 |
| collagen, type VIII, alpha1                                                           | COL8A1    | 0.4385      | 0.0036 |
| solute carrier family 23 (nucleobase transporters), member 3                          | SLC23A3   | 0.4387      | 0.0076 |
| A kinase (PRKA) anchor protein 13                                                     | AKAP13    | 0.4411      | 0.0099 |
| olfactory receptor, family 10, subfamily A, member 5                                  | OR10A5    | 0.4425      | 0.0067 |
| paired box gene 8                                                                     | PAX8      | 0.4452      | 0.0019 |
| phospholipase C, gamma 1                                                              | PLCG1     | 0.4464      | 0.0054 |
| RAB6B, member RAS oncogene family                                                     | RAB6B     | 0.4530      | 0.0007 |
| zinc finger protein 192                                                               | ZNF192    | 0.4573      | 0.0037 |
| family with sequence similarity 3, member D                                           | FAM3D     | 0.4588      | 0.0099 |
| hypothetical protein FLJ12700                                                         | FLJ12700  | 0.4605      | 0.0025 |
| phospholipase C, beta 2                                                               | PLCB2     | 0.4627      | 0.0019 |
| similar to matrilin 2 precursor                                                       | LOC285929 | 0.4664      | 0.0015 |
| mitogen-activated protein kinase kinase kinase kinase 5                               | MAP4K5    | 0.4689      | 0.0016 |
| fucosyltransferase 7 (alpha (1,3) fucosyltransferase)                                 | FUT7      | 0.4723      | 0.0039 |
| tripartite motif-containing 3                                                         | TRIM3     | 0.4749      | 0.0026 |
| solute carrier family 18 (vesicular monoamine), member 1                              | SLC18A1   | 0.4756      | 0.0011 |
| POU domain, class 4, transcription factor 1                                           | POU4F1    | 0.4773      | 0.0027 |
| plexin domain containing 1                                                            | PLXDC1    | 0.4778      | 0.0059 |
| glucosaminyl (N-acetyl) transferase 3, mucin type                                     | GCNT3     | 0.4789      | 0.0048 |
| guanine nucleotide binding protein (G protein), q polypeptide                         | GNAQ      | 0.4798      | 0.0064 |
| ELAV (embryonic lethal, abnormal vision, Drosophila)-like 3 (Hu                       | ELAVL3    | 0.4829      | 0.0052 |

|                                                                   |        |        |        |
|-------------------------------------------------------------------|--------|--------|--------|
| antigen C)                                                        |        |        |        |
| leucine proline-enriched proteoglycan (leprecan) 1                | LEPRE1 | 0.4840 | 0.0099 |
| melanoma antigen family A, 3                                      | MAGEA3 | 0.4843 | 0.0026 |
| melanoma antigen family A, 6                                      | MAGEA6 | 0.4843 | 0.0026 |
| protease, serine, 22                                              | PRSS22 | 0.4908 | 0.0081 |
| v-src sarcoma (Schmidt-Ruppin A-2) viral oncogene homolog (avian) | SRC    | 0.4924 | 0.0077 |
| homeo box A11                                                     | HOXA11 | 0.4928 | 0.0093 |
| leucine rich repeat neuronal 6A                                   | LRRN6A | 0.4931 | 0.0070 |
| FK506 binding protein 9, 63 kDa                                   | FKBP9  | 0.4976 | 0.0022 |
| matrix metalloproteinase 10                                       | MMP10  | 0.5036 | 0.0001 |
| ubiquitin specific protease 8                                     | USP8   | 0.5111 | 0.0006 |
| platelet-derived growth factor beta polypeptide                   | PDGFB  | 0.5355 | 0.0005 |
